# Supplementary material for: The characteristics and associations between trait and state time perspective in adolescents with depression: a questionnaire and sandplay study
Source: PeerJ. 2024 Oct 11;12:e18257. doi: 10.7717/peerj.18257 (PMC11472794; doi:10.7717/peerj.18257)
Supplement: Supplemental Information 1 [file peerj-12-18257-s001.xlsx]

## Sheet: ZTPI-C
Participants	Sex	Age	SDS	Raw scores for each question on the Chinese version of Zimbardo Time Perspective Inventory(ZTPI-C)
				Q1	Q2	Q3	Q4	Q5	Q6	Q7	Q8	Q9	Q10	Q11	Q12	Q13	Q14	Q15	Q16	Q17	Q18	Q19	Q20	Q21	Q22	Q23	Q24	Q25
1	2	13	41	4	4	2	4	4	4	3	4	4	4	2	1	5	4	3	5	4	4	3	3	1	3	4	4	4
1	2	13	34	4	4	5	3	2	4	5	5	5	4	5	1	5	5	4	5	2	3	1	1	3	3	5	4	4
1	2	15	33	4	5	1	4	2	5	4	1	4	4	3	4	4	5	2	4	1	4	1	2	3	4	4	4	3
1	2	14	51	3	4	5	4	1	4	3	4	4	4	4	3	5	5	3	5	5	4	4	4	2	4	3	4	5
1	2	14	45	5	3	5	4	1	1	2	4	5	1	5	5	5	5	5	5	5	1	1	1	1	5	1	5	1
1	2	15	29	4	1	3	3	5	3	4	3	5	4	2	3	2	4	3	1	4	3	3	3	3	3	3	4	2
1	2	16	29	4	4	4	4	4	4	3	4	4	4	4	4	4	4	4	4	4	4	4	4	4	4	4	4	4
1	1	14	44	4	3	3	2	3	2	2	3	3	3	2	3	3	4	2	1	2	2	1	2	2	3	1	3	3
1	1	15	39	5	5	3	5	5	4	4	5	5	5	4	5	5	5	5	4	5	5	5	5	4	5	4	5	5
1	1	15	42	5	3	3	4	3	3	2	1	5	4	1	3	5	5	2	3	5	3	3	2	3	5	3	5	3
1	2	13	28	5	5	4	4	5	5	4	2	5	4	3	3	5	5	1	2	3	2	2	4	4	4	2	4	3
1	2	15	27	5	4	4	4	4	4	3	4	4	3	3	2	5	5	2	2	2	1	2	4	3	3	4	3	4
1	1	13	29	5	5	2	4	5	5	5	4	5	4	1	1	5	5	3	5	3	4	3	4	5	5	4	5	5
1	1	16	41	4	3	2	4	4	4	3	4	4	5	1	5	5	4	4	4	2	3	1	3	3	3	4	4	3
1	2	13	30	5	5	1	5	5	5	3	5	5	5	1	3	5	5	3	5	5	3	1	4	3	5	4	3	3
1	1	14	31	5	4	2	5	5	3	4	3	4	4	1	5	5	5	2	5	4	3	1	4	5	3	3	5	2
1	2	14	32	5	5	1	4	5	5	1	1	5	5	1	1	5	5	1	1	5	1	1	1	1	1	1	5	1
1	1	14	34	5	5	1	5	5	5	5	1	5	5	1	1	5	5	1	1	1	1	1	5	5	1	1	5	5
1	2	14	38	1	5	2	4	4	3	4	3	5	2	3	5	5	4	2	4	5	3	5	5	1	5	5	4	5
1	2	15	39	5	5	3	3	3	2	5	4	5	3	2	4	5	5	4	4	5	5	1	2	1	2	3	4	5
1	1	15	29	5	5	3	4	5	3	2	1	5	4	2	5	5	2	4	4	5	4	2	4	5	5	2	4	5
1	2	14	28	5	5	5	2	4	4	2	1	4	2	4	1	5	5	2	1	4	3	2	3	4	5	2	4	4
1	2	15	27	5	3	4	4	4	3	3	2	4	3	4	3	5	5	2	1	2	2	2	4	2	3	2	4	4
1	1	16	31	5	5	1	5	5	5	5	5	1	5	1	2	5	1	3	5	5	5	2	5	2	5	3	5	5
1	1	15	48	3	2	2	2	4	5	4	2	4	3	2	1	4	1	2	2	3	2	1	4	1	4	2	5	4
1	1	15	28	5	3	2	4	5	4	3	1	5	3	3	2	5	5	2	4	3	1	1	4	1	4	1	5	4
1	2	16	49	4	4	5	3	4	3	2	2	4	3	3	4	5	4	3	3	5	3	5	1	1	4	1	4	5
1	1	14	33	5	4	3	5	5	4	5	4	5	5	3	5	5	5	2	4	2	1	2	3	3	5	5	5	5
1	2	13	28	4	5	1	4	4	3	3	2	4	4	2	3	4	5	2	2	4	3	3	3	4	4	3	4	3
1	1	14	49	4	1	1	3	2	4	4	5	2	4	1	2	3	4	3	4	3	4	5	3	3	4	4	4	3
1	1	13	22	5	5	3	5	5	4	5	3	5	4	2	1	5	5	3	2	3	3	1	3	2	3	3	4	3
1	2	13	45	5	5	2	4	1	4	2	1	5	4	1	1	1	5	2	2	2	2	1	4	2	1	2	5	2
1	2	13	46	4	5	1	2	5	2	2	1	4	2	1	5	3	5	3	4	4	3	2	3	3	3	1	2	5
1	2	13	36	5	4	1	4	3	4	4	3	5	4	1	3	5	5	5	1	5	1	3	5	3	4	3	5	3
1	1	16	34	5	5	4	2	5	4	4	1	5	4	3	1	1	5	3	1	3	3	3	4	3	2	1	3	5
1	1	15	33	4	5	1	5	5	5	4	5	5	5	1	4	5	3	1	5	3	3	5	4	5	5	3	5	5
1	2	13	49	5	3	3	5	5	4	1	2	3	4	2	2	5	4	2	4	2	1	2	3	1	1	4	3	1
1	2	15	31	5	4	2	4	5	5	3	4	5	4	1	4	4	5	3	4	4	2	2	4	2	2	4	5	4
1	2	13	26	5	4	4	5	5	5	5	3	5	4	1	1	4	5	3	3	3	2	2	3	1	3	2	5	3
1	2	15	49	2	2	3	4	4	5	1	3	3	3	3	4	1	4	2	1	3	1	1	4	3	4	2	4	4
1	1	13	27	5	4	1	5	5	4	3	2	5	4	1	5	5	5	3	3	3	5	3	4	4	5	4	3	3
1	1	15	38	5	2	2	2	2	3	2	2	3	4	1	4	2	5	4	1	3	1	1	3	1	5	3	3	3
1	1	15	29	5	5	4	5	5	4	2	1	5	4	5	5	5	5	3	5	4	2	4	4	3	5	3	5	5
1	1	13	43	5	3	4	3	4	5	3	4	4	4	3	1	5	2	4	2	4	2	3	1	2	4	2	2	3
1	2	15	36	5	5	3	2	5	5	2	4	3	4	1	4	3	4	4	3	2	3	1	1	3	5	3	4	3
1	2	13	48	5	5	3	5	5	4	4	5	5	5	4	5	5	5	5	4	5	5	5	5	4	5	4	5	5
1	2	16	36	5	4	2	5	5	3	4	3	4	4	1	5	5	5	2	5	4	3	1	4	5	3	3	5	2
1	2	15	35	5	4	4	4	4	4	3	4	4	3	3	2	5	5	2	2	2	1	2	4	3	3	4	3	4
1	2	16	21	5	5	2	4	5	5	5	4	5	4	1	1	5	5	3	5	3	4	3	4	5	5	4	5	5
1	2	15	45	4	3	2	4	4	4	3	4	4	5	1	5	5	4	4	4	2	3	1	3	3	3	4	4	3
1	2	16	26	5	5	4	4	5	5	4	2	5	4	3	3	5	5	1	2	3	2	2	4	4	4	2	4	3
1	1	13	44	3	3	1	3	4	3	3	1	3	3	1	4	5	4	5	1	5	4	3	3	1	3	4	3	1
1	1	15	46	3	2	1	2	4	3	3	2	2	4	3	4	5	4	3	4	1	4	1	3	3	2	5	2	4
1	2	15	33	4	4	3	2	5	3	3	2	4	3	4	2	3	4	3	2	3	3	4	2	3	3	2	3	2
1	1	13	48	3	3	2	3	2	3	2	1	5	2	2	2	3	4	2	1	3	2	3	3	2	3	3	3	2
1	1	15	38	5	5	3	1	4	5	1	1	5	4	1	3	5	5	3	3	3	3	2	2	1	4	2	3	5
1	1	15	24	5	3	4	2	4	3	2	4	4	4	3	3	3	4	5	4	3	4	4	4	3	4	4	3	4
1	2	15	45	4	2	3	3	3	4	5	4	4	3	2	4	5	4	2	5	3	5	1	3	3	4	5	3	5
1	1	16	41	5	5	3	3	2	3	4	5	4	5	4	5	5	5	5	4	4	4	1	3	1	5	5	5	4
1	2	15	36	5	5	1	3	2	4	5	1	5	2	4	1	5	5	2	1	4	3	5	2	1	5	1	4	4
1	2	13	46	4	5	2	4	3	5	4	5	5	4	1	5	5	5	5	5	3	5	4	4	3	5	3	5	5
1	1	15	44	4	5	3	2	4	4	1	1	4	3	2	1	5	5	3	2	2	1	4	4	1	2	2	2	5
1	1	16	49	3	4	4	3	3	2	2	3	4	2	2	1	2	5	3	2	4	3	3	3	2	3	2	4	3
1	1	15	50	5	5	5	5	1	5	1	5	5	5	5	3	5	5	5	5	2	5	3	5	3	5	2	5	3
1	2	17	45	5	5	1	4	5	5	1	3	5	5	2	4	5	5	4	1	5	4	3	2	1	5	2	5	3
1	2	17	44	4	3	2	3	4	4	4	4	3	3	1	4	2	4	3	4	2	2	2	4	2	2	3	4	4
1	2	17	29	5	5	3	5	5	3	5	1	5	5	1	1	5	5	3	1	3	2	1	4	5	2	2	5	2
1	1	17	38	4	4	2	4	3	5	4	2	5	4	2	1	3	4	4	2	4	3	2	4	2	4	2	4	3
1	2	17	39	5	5	2	5	5	5	5	3	5	4	1	1	5	5	5	5	3	3	1	4	4	4	5	3	5
1	2	13	51	5	5	5	3	2	1	4	5	4	4	4	2	5	5	5	5	4	4	1	4	3	5	5	4	5
1	1	13	41	4	4	4	4	5	4	1	5	5	4	5	3	5	5	2	5	3	3	2	4	3	3	5	5	5
1	2	16	42	5	5	1	5	4	1	1	5	4	5	5	4	5	5	4	4	4	4	4	4	3	3	4	4	4
1	1	13	36	5	5	3	4	5	3	3	2	5	4	3	3	3	5	4	3	4	3	3	3	3	4	2	5	2
1	1	17	34	4	5	3	4	5	4	1	2	3	5	1	4	5	5	2	1	5	1	2	4	2	2	3	2	4
1	1	17	48	2	2	3	1	3	1	1	4	3	4	3	4	1	1	3	4	4	2	4	3	3	3	5	3	5
1	2	17	50	2	3	3	4	4	5	5	3	2	4	3	3	5	5	3	3	3	3	4	3	5	5	1	5	5
1	1	16	29	5	5	1	5	5	5	5	1	5	5	1	1	5	5	1	1	5	1	5	5	1	1	1	5	1
1	1	17	36	4	5	3	2	4	5	4	4	4	3	3	4	4	5	4	4	5	2	4	5	2	5	4	3	5
1	2	17	39	5	5	2	5	4	1	5	5	5	5	2	5	5	5	1	1	2	3	1	5	5	1	5	5	4
1	2	17	40	5	5	5	5	3	1	1	1	5	5	1	1	3	5	5	1	1	1	1	5	5	5	1	5	5
1	1	17	41	2	5	3	3	4	3	1	4	5	5	3	1	5	5	5	3	3	3	3	4	1	2	4	4	4
1	1	17	51	4	2	2	4	2	2	1	5	2	3	2	5	5	1	3	5	4	4	5	2	4	5	5	5	5
1	1	17	42	5	5	1	5	3	5	1	5	5	4	1	5	5	5	1	3	1	4	1	5	5	1	1	5	5
1	2	16	43	5	5	3	5	4	4	4	3	3	1	1	2	5	5	4	2	5	5	1	5	3	5	5	3	4
1	1	13	46	4	1	4	4	2	4	3	4	3	4	4	1	3	5	3	4	4	3	3	3	3	4	5	4	4
1	2	16	35	5	5	1	5	4	3	5	4	5	5	3	1	4	5	1	3	5	3	3	4	3	4	3	4	4
1	2	17	41	2	5	3	4	4	3	1	3	3	4	2	5	5	5	4	5	5	5	3	3	4	3	5	4	5
1	2	17	37	4	5	4	3	5	5	5	1	5	4	3	4	5	5	3	1	3	3	3	2	1	5	1	4	4
1	1	17	29	5	5	5	5	5	4	1	5	5	5	1	4	5	5	5	5	5	5	1	5	5	3	5	5	5
1	2	17	33	5	5	3	3	3	3	4	2	3	3	2	1	3	5	2	1	3	1	3	3	3	3	1	3	4
1	2	17	32	5	3	2	5	5	5	4	1	5	5	1	1	1	5	4	1	2	2	4	5	3	3	1	5	1
1	2	13	48	4	3	3	4	3	4	3	5	2	4	3	4	3	3	4	4	3	3	3	3	2	2	3	3	3
1	2	17	41	4	3	4	4	3	3	2	4	3	4	2	1	5	1	5	5	4	4	4	3	3	3	5	3	3
1	2	17	43	4	3	3	5	4	4	4	3	4	4	3	4	4	5	4	5	4	5	4	5	3	3	4	4	5
1	2	13	32	5	5	1	5	5	5	4	1	5	5	1	5	4	5	5	1	5	1	1	5	4	5	1	3	5
1	1	17	33	5	5	3	4	5	4	4	4	5	4	2	4	5	5	3	5	4	4	3	4	3	2	5	3	2
1	1	17	49	5	3	1	4	3	1	1	5	5	3	1	1	5	5	3	1	4	1	1	3	1	1	5	1	5
1	2	16	39	3	5	1	3	5	2	1	1	4	5	4	4	5	5	4	2	4	5	4	3	3	5	3	4	5
1	2	16	33	5	5	1	5	5	5	4	1	5	5	1	1	1	5	2	5	4	3	1	5	5	2	5	5	5
1	2	16	51	4	2	1	5	3	5	1	3	2	4	2	2	5	3	3	4	4	1	3	4	3	2	2	2	1
1	2	17	45	5	5	5	2	4	1	4	5	5	3	3	1	5	5	4	3	3	4	2	4	3	3	5	3	5
1	1	17	38	5	5	1	5	4	5	1	1	5	4	1	2	5	5	3	5	5	1	1	5	5	1	1	5	3
1	1	13	45	5	5	3	1	5	4	5	4	5	3	4	3	5	5	5	4	4	1	5	1	5	5	5	3	5
1	1	16	26	5	5	1	5	5	5	5	5	5	5	1	1	4	5	1	5	5	4	4	5	1	5	5	4	5
1	2	13	38	5	5	2	5	2	3	5	4	5	4	1	2	4	5	3	4	4	4	3	3	4	4	4	3	5
1	2	17	35	5	5	2	5	5	5	5	1	5	5	1	5	5	5	1	1	3	1	1	3	1	3	1	5	1
1	1	16	46	2	2	2	2	4	2	4	2	4	4	2	4	2	4	2	2	4	2	3	2	2	4	2	4	2
1	1	16	46	3	5	1	3	2	5	3	3	3	4	3	3	4	5	5	1	1	5	1	4	3	3	3	3	5
1	2	16	51	1	1	2	5	2	5	1	1	4	5	3	4	5	1	4	1	3	4	5	3	4	1	1	5	4
1	1	13	44	5	5	3	5	5	5	5	5	5	5	3	5	5	5	1	5	1	5	1	5	5	5	5	5	5
1	2	17	48	4	4	2	2	4	3	1	2	3	4	2	3	4	4	3	3	4	2	4	4	1	2	3	2	2
1	2	15	46	5	5	3	5	3	4	3	4	5	4	3	5	5	4	3	4	4	4	3	4	3	4	4	4	3
1	2	15	46	3	5	2	4	3	4	2	4	3	2	2	4	5	5	5	4	3	3	3	4	3	4	4	3	1
1	1	16	44	5	5	3	4	2	4	1	2	5	3	1	5	5	3	5	4	4	3	2	4	3	5	4	5	4
1	2	15	51	4	4	1	5	3	4	1	4	5	3	2	3	5	5	2	2	2	3	2	4	2	3	4	4	4
1	1	15	29	4	3	3	4	5	5	1	1	5	4	3	2	5	5	1	5	5	4	5	5	5	5	5	5	4
1	1	13	44	4	4	2	4	3	5	3	2	5	5	2	5	5	5	4	4	4	3	3	2	1	5	4	3	5
1	1	15	48	3	1	3	5	4	3	2	4	5	5	1	3	5	3	1	3	5	1	3	3	2	4	2	3	5
1	2	15	37	5	5	1	5	5	5	4	2	5	5	1	1	5	4	4	2	1	1	5	5	3	2	4	5	5
1	1	15	33	5	5	4	4	3	4	1	5	4	4	4	1	5	5	4	4	5	4	5	3	1	5	5	1	5
1	2	15	32	5	4	1	4	5	2	2	3	4	4	2	3	5	4	2	4	3	4	2	4	1	4	4	4	4
1	2	13	40	5	3	4	5	1	4	5	2	5	5	3	3	5	5	4	5	4	5	2	4	2	5	4	5	5
1	2	15	43	5	4	5	3	5	5	2	2	5	4	3	3	5	5	4	3	4	3	3	3	3	2	3	3	4
1	1	13	33	5	5	2	5	5	3	2	5	5	5	2	5	5	5	3	5	3	2	1	4	3	5	4	5	5
1	2	15	47	5	3	4	5	1	1	5	4	3	3	1	5	1	5	5	3	4	3	3	2	1	5	4	5	4
1	1	15	52	1	3	2	1	5	1	1	1	4	3	1	4	5	5	5	1	1	3	5	3	3	3	4	1	3
1	1	13	50	3	3	3	3	5	5	3	5	3	4	3	5	5	1	5	5	3	5	3	3	3	4	5	4	5
1	1	16	40	5	5	1	5	5	1	1	5	5	4	1	1	5	5	3	2	3	1	1	4	5	5	5	4	5
1	2	15	41	5	5	1	3	5	3	1	3	5	3	2	3	5	5	5	5	5	5	3	3	4	1	3	5	5
1	1	16	44	5	1	2	3	4	2	3	1	4	2	3	1	5	1	5	5	3	2	3	4	3	4	5	4	5
1	1	15	43	3	3	4	3	3	4	1	1	3	3	3	3	5	1	2	2	4	3	1	4	4	1	1	4	4
1	1	15	32	4	5	1	4	5	5	1	1	5	4	2	5	5	5	3	2	3	4	1	5	1	4	3	5	5
1	1	13	39	4	3	1	5	2	5	4	2	4	3	1	3	2	2	2	1	3	2	2	4	3	4	1	5	2
1	1	13	31	5	5	3	4	3	4	1	1	5	5	3	2	5	5	1	2	5	2	3	5	3	3	1	5	5
1	1	12	51	3	2	4	4	1	5	2	5	2	3	3	5	5	1	5	5	4	5	1	3	3	5	5	3	5
1	1	12	47	5	4	3	1	5	1	5	5	5	2	5	1	5	5	5	5	5	3	3	3	1	5	5	1	5
1	1	12	39	4	3	3	5	4	3	4	3	4	4	1	4	4	4	3	4	3	1	1	1	3	4	3	5	3
1	1	12	33	5	5	4	5	5	4	3	2	5	4	4	5	5	5	5	4	5	4	2	4	1	4	2	4	4
1	1	12	51	5	5	5	1	5	3	1	5	5	1	5	5	5	5	1	5	1	1	1	1	5	5	5	2	5
1	2	12	45	5	5	3	2	4	5	5	5	5	2	2	2	5	5	4	5	4	3	2	3	1	4	5	5	4
1	2	12	31	5	5	3	4	5	5	4	4	4	3	4	2	4	5	5	5	4	3	3	4	3	4	4	4	5
1	1	13	47	3	5	3	3	5	4	3	4	5	4	4	2	2	5	4	5	3	3	3	4	3	2	5	4	2
1	2	13	33	5	5	3	5	4	5	4	5	5	5	5	5	5	5	4	5	5	5	5	5	1	5	5	5	5
1	1	12	35	5	5	4	4	5	5	2	3	5	5	4	2	5	5	4	5	4	4	3	4	2	2	2	5	4
1	1	12	45	4	3	3	4	2	3	3	3	3	2	4	5	5	4	3	5	4	3	3	2	2	4	5	4	4
1	1	16	49	5	5	1	4	3	4	3	1	4	4	3	4	5	5	4	4	4	3	3	3	3	4	2	4	4
1	2	13	35	5	5	3	4	4	3	4	5	4	3	1	4	4	5	2	5	2	1	2	2	4	4	5	4	4
1	1	12	40	4	5	4	5	5	4	2	5	4	4	1	5	2	4	4	5	4	4	5	5	5	5	3	4	5
1	1	12	49	4	5	3	2	5	3	3	4	5	3	2	4	2	5	4	5	4	3	1	4	2	4	5	4	4
1	2	12	38	5	3	2	5	5	5	2	4	3	4	2	1	4	4	2	3	4	2	2	4	3	3	4	5	5
1	2	13	42	5	4	2	5	5	5	3	2	5	5	1	2	4	5	3	1	3	4	3	2	3	4	1	5	4
1	1	13	35	5	4	1	3	3	2	2	4	2	4	3	5	5	5	3	2	3	2	5	3	4	3	4	4	2
1	1	12	38	5	5	4	5	4	5	5	5	5	5	5	5	5	5	5	5	2	4	1	5	4	5	5	5	4
1	1	12	42	5	4	1	4	5	4	2	5	4	5	2	2	5	5	2	4	2	2	2	1	1	5	4	2	4
1	1	12	33	5	5	1	5	5	5	1	1	5	5	1	5	1	5	5	1	5	5	1	5	5	1	1	5	1
1	1	12	41	4	4	4	4	4	4	4	4	4	4	1	1	1	1	1	1	2	1	3	1	1	1	1	1	1
1	1	12	38	5	5	1	5	1	5	5	1	5	5	1	1	1	1	1	1	1	1	1	1	1	1	1	1	1
1	1	13	33	5	4	1	5	3	4	3	3	4	5	1	3	5	5	3	4	1	4	4	1	4	2	3	4	1
1	1	16	35	5	5	1	5	5	5	1	1	5	5	1	5	5	5	5	1	1	1	1	5	1	5	1	5	1
1	2	12	49	3	3	1	4	4	3	2	2	4	4	1	3	5	3	3	4	3	3	1	3	3	3	4	4	4
1	2	14	34	4	5	4	4	4	4	4	2	4	4	4	2	4	3	4	4	2	2	4	5	4	4	2	4	4
1	1	14	47	2	4	2	3	4	3	2	3	2	3	2	3	3	3	4	4	4	4	3	3	3	2	2	4	3
1	2	14	57	4	3	2	3	4	3	4	3	4	4	2	3	4	4	3	3	3	3	2	3	2	3	3	3	3
1	1	14	52	5	5	2	1	4	5	2	2	3	2	1	2	5	4	2	2	4	4	4	3	1	2	3	2	4
1	2	14	48	1	2	4	4	2	5	3	4	2	4	4	4	4	1	5	4	3	5	3	4	3	3	4	4	2
1	2	14	42	5	4	2	4	4	3	3	4	4	4	2	4	4	5	4	4	4	4	1	4	2	4	4	4	4
1	2	14	41	5	3	2	4	4	4	3	2	4	4	2	4	3	5	3	2	3	4	4	3	2	4	2	3	3
1	2	18	48	5	3	2	3	3	4	2	2	4	4	4	3	4	1	3	3	4	4	3	3	4	4	3	3	4
1	2	14	44	5	4	2	5	5	4	5	2	4	4	2	4	4	5	2	4	2	2	2	4	2	2	3	5	2
1	2	14	56	5	4	3	4	3	4	3	4	4	4	2	2	3	4	2	4	2	2	2	5	2	4	4	4	2
1	1	14	45	3	3	3	3	3	2	3	2	3	2	3	3	3	3	4	3	4	3	2	1	2	4	3	4	3
1	2	14	30	4	4	3	4	3	4	2	2	3	4	2	4	4	4	3	3	4	3	3	4	2	4	4	4	4
1	2	14	48	4	3	2	3	3	4	4	3	4	4	3	4	4	3	3	4	4	4	2	3	2	2	4	3	4
1	1	18	40	4	1	3	5	4	4	3	4	3	5	2	4	3	3	3	1	2	1	2	4	3	4	2	4	2
1	2	14	40	4	4	3	4	3	4	3	3	4	4	2	2	4	4	4	4	4	4	3	4	4	4	4	3	4
1	2	18	40	4	3	4	4	4	3	3	4	4	4	4	1	4	4	3	4	4	4	2	3	4	4	4	3	4
1	2	14	57	5	3	2	4	4	5	3	3	4	4	1	2	4	4	3	4	3	3	4	4	3	4	3	3	2
1	2	14	40	4	3	2	4	3	4	4	3	4	4	2	3	4	4	4	4	3	4	2	4	2	4	4	3	4
1	2	14	37	4	3	4	2	5	2	3	2	4	3	3	3	2	2	2	2	4	3	2	1	2	4	2	4	2
1	2	14	42	5	4	4	4	4	3	3	3	3	4	3	3	4	4	3	3	4	4	3	2	3	3	3	3	3
1	2	14	51	4	2	3	3	2	3	2	4	2	2	3	2	4	3	4	4	4	2	2	2	4	2	4	3	2
1	1	14	41	3	4	3	4	4	4	3	2	4	4	3	3	3	3	3	3	3	3	3	3	3	3	3	2	3
1	2	14	50	4	4	1	4	5	4	1	1	5	4	2	2	4	2	5	2	4	2	2	4	3	3	1	2	3
1	2	14	49	4	3	4	3	4	3	3	2	2	3	4	3	4	2	4	4	2	4	4	2	4	4	4	4	3
1	2	14	36	4	3	2	4	4	4	3	3	2	3	4	4	4	4	3	4	4	4	4	4	4	4	4	4	4
1	1	14	42	5	5	3	4	3	5	5	4	5	4	2	2	4	5	3	4	2	3	4	4	2	2	4	4	4
1	2	14	38	4	3	2	4	3	3	4	3	3	4	3	3	4	4	3	4	4	4	3	3	2	3	3	4	3
1	2	18	49	5	3	4	3	4	4	3	3	5	4	3	3	5	4	4	4	4	3	2	4	4	3	4	4	4
1	2	14	40	4	2	2	5	5	5	3	2	4	4	2	1	2	3	2	2	2	3	2	5	2	2	2	3	2
1	2	14	62	4	4	4	3	3	4	4	3	4	4	2	3	3	4	4	3	3	3	4	4	4	2	3	3	3
1	2	18	47	4	3	4	4	4	2	2	3	4	4	3	4	5	3	1	4	3	5	4	4	4	4	2	2	4
1	2	14	46	5	3	4	3	3	3	3	2	3	3	4	3	3	4	4	3	4	5	5	3	4	4	3	2	4
1	1	18	41	5	4	2	4	4	4	4	4	4	4	2	3	4	4	3	3	3	2	2	4	2	2	2	4	4
1	2	14	53	5	3	3	4	4	4	2	3	4	4	2	4	5	4	3	4	2	4	3	4	2	4	3	2	4
1	2	14	30	5	2	3	4	5	5	1	2	4	5	2	2	4	5	2	2	4	4	3	4	3	4	2	5	4
1	1	18	33	4	2	4	4	5	5	2	1	1	4	3	1	1	1	5	2	1	1	1	2	1	4	1	5	1
1	2	14	38	5	4	3	4	5	4	4	3	4	4	2	1	4	5	2	2	5	4	4	3	4	4	1	2	2
1	2	18	42	4	4	4	4	4	2	5	2	4	4	4	4	4	4	3	2	4	4	3	2	3	4	2	4	4
1	2	18	44	5	4	4	4	5	2	4	2	3	4	3	4	3	4	4	2	2	3	2	3	3	4	3	4	4
1	2	14	49	2	1	1	1	1	1	1	1	1	1	1	1	2	1	4	4	1	2	2	3	3	2	3	3	3
1	2	14	34	5	4	2	3	4	2	3	1	4	3	2	3	2	4	2	2	4	3	1	4	3	4	2	3	3
1	2	14	43	4	4	4	2	4	3	3	2	4	3	4	5	5	4	4	3	4	4	5	3	4	4	2	3	4
1	2	14	33	4	4	2	4	5	5	4	2	4	4	2	2	4	4	2	2	2	4	2	4	2	2	2	4	2
1	2	14	48	4	2	5	3	3	3	3	3	3	3	4	3	3	2	5	4	4	3	3	3	4	3	2	3	3
1	2	14	51	4	5	5	2	4	2	3	5	1	3	5	2	3	5	3	2	5	4	3	1	1	2	3	1	3
1	2	14	45	4	3	3	3	4	4	3	3	4	4	3	3	4	2	2	4	3	4	2	3	3	4	2	3	3
1	2	18	36	4	4	2	4	4	4	4	2	4	4	2	2	3	4	2	2	2	3	2	5	3	2	2	4	2
1	2	18	32	3	3	3	3	4	4	3	3	4	4	3	3	3	3	3	3	3	3	3	3	3	3	3	3	3
1	2	18	42	4	3	3	4	4	5	3	3	4	4	3	1	4	4	2	2	3	3	4	4	2	4	2	4	4
1	2	18	46	5	5	4	3	3	3	3	2	4	3	2	1	1	4	3	4	4	4	3	1	4	5	3	4	3
1	2	18	51	4	3	4	4	2	4	2	4	3	4	4	4	4	4	4	4	1	4	4	3	3	3	3	3	4
1	2	18	35	4	4	3	2	5	5	4	2	4	4	4	2	2	4	2	2	2	3	3	4	2	4	2	4	2
1	1	14	39	5	3	2	5	5	2	4	1	5	5	2	1	5	5	2	4	4	4	2	4	2	3	1	2	4
1	2	14	46	2	4	2	4	4	4	4	2	4	4	4	2	4	2	2	4	2	4	2	4	4	4	4	4	4
1	1	14	38	5	5	4	2	5	4	4	4	5	4	2	2	4	5	5	2	3	2	1	3	5	4	2	2	4
2	2	14	75	4	1	4	2	3	4	4	5	1	1	3	5	5	1	5	5	5	5	5	3	3	3	5	3	5
2	1	13	70	5	4	5	3	3	2	3	5	2	4	2	5	2	4	4	2	3	3	2	3	3	4	4	5	4
2	1	14	70	3	3	5	2	2	2	3	4	2	4	4	2	4	4	4	4	4	4	4	3	4	4	3	3	4
2	1	16	56	3	3	3	4	4	4	4	2	3	3	2	3	4	3	2	3	2	4	3	3	3	4	3	3	3
2	1	15	55	3	3	3	4	3	2	2	4	3	4	3	2	2	2	3	2	2	3	2	3	2	2	2	4	4
2	2	16	73	4	3	1	4	4	5	3	5	3	5	1	2	2	4	2	5	4	4	3	4	2	2	5	3	4
2	2	15	62	4	2	4	3	2	3	4	5	3	3	4	5	5	1	5	5	5	5	5	3	4	4	5	3	4
2	1	13	65	5	1	5	2	2	4	2	4	3	2	5	4	3	4	5	4	4	5	4	1	4	4	5	1	5
2	1	14	65	4	3	3	2	3	2	3	4	4	4	2	2	4	3	4	5	5	4	5	2	5	4	5	4	4
2	2	14	82	5	2	4	4	4	2	5	4	3	4	3	4	5	3	5	4	5	5	3	2	3	5	4	2	5
2	1	15	65	1	1	2	2	2	2	3	4	2	4	3	4	4	2	4	4	5	4	4	2	3	3	4	3	5
2	2	16	72	4	1	5	1	5	4	1	5	1	2	5	5	1	2	5	5	5	5	5	1	5	5	5	2	1
2	2	13	67	4	5	5	3	2	4	4	5	2	2	4	5	5	2	4	5	4	5	2	3	5	5	5	4	4
2	1	16	77	1	1	4	2	1	1	2	5	4	4	3	3	5	1	5	5	4	4	4	1	3	4	5	3	4
2	2	14	66	2	3	5	1	3	1	3	5	2	2	5	4	5	3	5	5	4	5	5	1	4	5	5	4	4
2	2	13	77	2	3	5	1	3	1	1	5	3	3	4	3	3	3	3	5	3	4	5	1	3	1	5	1	3
2	1	14	68	3	3	4	2	2	3	2	4	3	3	4	3	4	5	4	4	5	5	2	2	5	4	2	2	3
2	1	16	67	2	4	3	1	2	3	1	4	2	3	1	5	5	1	5	5	5	4	5	1	4	2	5	5	5
2	1	15	73	2	2	3	3	2	4	3	2	2	3	2	3	5	2	4	2	3	3	2	3	4	4	4	4	3
2	2	16	81	5	1	4	5	1	5	4	5	2	2	4	5	5	5	5	5	5	5	5	2	4	4	5	1	5
2	2	15	75	3	3	4	3	1	3	2	5	3	4	3	2	1	1	4	5	4	3	3	3	3	3	5	4	4
2	1	13	71	2	2	4	3	2	2	1	5	1	5	3	5	3	1	5	5	3	3	5	1	5	3	5	1	3
2	2	15	68	5	5	4	3	4	3	2	4	5	3	4	1	3	4	4	4	3	3	3	2	5	4	4	2	4
2	2	17	68	2	2	3	4	3	2	3	3	3	2	4	4	4	4	4	4	5	4	4	2	4	4	2	4	4
2	2	15	80	5	3	4	4	1	4	1	5	3	4	1	5	5	3	4	5	5	2	1	3	1	5	5	3	5
2	2	16	71	4	2	2	3	3	4	4	4	2	3	2	1	4	3	3	4	4	3	3	3	2	3	3	3	4
2	2	13	76	1	4	5	1	1	1	3	5	1	2	4	4	5	1	5	5	4	4	1	2	4	4	5	2	5
2	2	16	77	3	2	3	2	2	2	2	4	2	3	3	3	4	4	4	4	4	4	3	3	2	4	4	2	2
2	2	14	85	4	3	4	3	2	1	5	5	3	3	5	5	5	3	1	1	5	4	5	3	5	2	5	3	5
2	2	15	55	4	3	2	5	2	5	2	2	3	4	1	4	4	4	3	4	3	4	5	3	3	2	4	4	2
2	2	18	65	4	3	3	1	2	3	2	5	1	5	3	4	5	2	4	5	4	5	5	3	3	5	5	2	4
2	1	16	65	3	2	4	1	1	1	5	5	3	3	3	5	4	4	5	5	4	3	5	3	5	5	5	1	2
2	1	16	62	4	2	4	3	4	3	4	4	4	4	3	2	4	4	4	4	4	4	4	4	2	4	4	4	4
2	1	17	81	2	4	4	2	3	2	3	2	4	2	4	3	4	5	5	4	5	5	4	2	4	5	2	5	4
2	1	15	81	4	2	4	4	3	1	4	5	5	2	4	4	4	3	5	5	4	3	1	2	4	5	5	4	5
2	2	15	55	5	5	3	4	4	4	3	2	4	3	3	1	5	5	4	1	5	5	3	3	3	4	2	3	4
2	1	14	73	4	4	2	2	4	2	5	5	5	5	4	5	3	5	5	5	5	5	5	3	3	5	5	3	5
2	1	15	64	3	2	3	4	2	4	3	3	2	2	2	2	5	3	5	4	4	4	4	3	3	2	4	3	4
2	2	14	81	2	2	4	2	2	3	1	4	2	4	3	3	4	1	3	5	5	5	5	3	4	5	5	2	3
2	1	15	59	4	2	3	4	4	4	3	4	4	3	3	3	5	4	4	4	2	4	4	4	3	3	4	3	4
2	1	14	56	5	3	3	2	5	3	5	3	5	3	3	1	2	5	3	5	3	3	2	3	3	3	4	2	5
2	2	13	60	4	2	3	2	3	3	2	4	3	4	3	3	4	3	4	3	4	4	4	3	3	4	3	3	4
2	2	12	66	2	2	4	3	2	3	2	3	4	3	3	3	4	2	4	4	3	3	3	3	4	3	4	3	4
2	2	14	72	3	2	3	2	2	4	3	4	1	3	3	1	3	1	4	5	4	5	3	4	3	2	5	2	1
2	1	13	81	2	1	5	1	2	2	3	3	1	2	5	5	5	1	5	5	4	5	5	2	5	3	5	2	3
2	2	13	62	4	4	4	5	4	4	5	2	5	4	2	1	4	5	3	4	2	2	1	4	3	4	2	4	4
2	2	14	67	4	2	5	3	3	1	2	5	2	3	4	3	4	3	4	5	4	3	3	1	5	4	5	2	3
2	1	18	72	3	3	2	2	3	1	2	4	4	2	3	2	4	4	2	4	5	4	4	2	4	4	4	2	4
2	2	16	55	4	4	1	5	4	5	5	3	3	3	2	2	4	4	3	4	2	2	4	3	3	4	4	4	5
2	2	14	66	2	3	3	3	3	3	3	3	4	3	3	4	4	3	4	4	4	4	4	3	3	3	4	4	4
2	2	14	76	2	4	5	2	3	2	3	3	2	3	5	3	5	4	5	5	3	3	3	2	3	3	5	3	4
2	2	14	68	5	2	4	2	2	4	3	5	2	2	3	4	5	4	5	5	4	4	4	2	3	3	5	4	4
2	2	15	68	2	2	4	2	5	4	1	5	4	3	4	3	5	4	4	5	2	2	3	2	1	5	3	3	5
2	2	14	71	3	3	4	3	3	3	4	4	3	3	2	3	5	3	4	4	4	2	4	4	2	2	4	4	4
2	2	18	67	3	2	5	3	3	3	3	5	3	3	5	5	5	3	5	5	5	5	4	3	4	5	5	4	5
2	2	16	77	3	5	5	5	3	5	3	5	5	5	3	3	5	3	5	5	5	5	4	5	1	5	5	4	5
2	2	12	83	4	2	4	1	1	1	2	4	2	2	2	5	4	3	4	5	5	5	3	2	4	3	4	3	3
2	2	18	82	4	3	5	1	3	1	3	4	3	3	5	4	5	5	5	5	4	4	2	1	4	3		3	3
2	2	16	82	1	1	5	1	1	1	1	5	1	3	4	5	5	1	5	5	5	5	4	1	3	3	5	1	5
2	2	13	61	3	3	5	1	2	1	1	3	3	3	4	3	3	4	4	3	5	4	4	3	4	3	3	2	3
2	2	14	55	3	3	5	2	3	4	2	3	3	3	4	3	4	2	3	3	4	3	2	2	4	3	3	2	3
2	1	14	63	5	5	4	4	3	3	5	3	5	3	2	4	5	5	4	4	4	4	4	3	3	4	4	4	4
2	2	15	73	3	3	3	3	3	3	4	4	2	2	3	3	3	3	5	4	4	3	4	2	4	4	4	3	4
2	1	15	86	4	5	5	5	5	2	3	1	3	2	5	5	5	5	5	1	5	4	1	3	5	5	5	5	1
2	2	13	81	2	2	2	1	2	1	1	5	1	2	2	5	4	4	4	5	5	4	4	2	3	3	5	2	3
2	1	13	61	5	5	3	2	3	1	5	3	4	3	3	1	4	5	4	3	3	5	3	2	3	3	3	3	5
2	2	14	62	5	3	2	5	5	4	3	3	4	4	1	4	5	5	3	2	4	3	2	4	2	2	2	4	4
2	2	14	57	4	3	4	2	4	2	3	3	3	2	4	2	4	4	4	2	3	3	2	2	4	2	2	2	3
2	1	17	70	4	1	3	3	1	1	3	5	2	4	4	5	5	3	5	5	5	5	2	1	4	5	5	2	5
2	1	13	73	3	4	4	3	3	4	3	4	3	4	4	5	5	4	4	5	3	3	3	3	3	4	5	4	4
2	2	17	75	5	2	3	1	1	1	4	5	5	3	3	1	4	5	5	5	2	5	1	3	3	5	5	1	5
2	2	12	63	2	1	1	1	1	2	3	3	1	3	2	3	4	3	3	3	3	3	4	2	3	2	3	2	4
2	2	18	61	5	4	4	5	4	4	4	5	5	4	2	5	5	4	4	5	2	3	2	3	3	3	4	3	5
2	2	15	76	4	3	2	4	2	4	4	5	3	3	3	4	4	5	5	5	3	3	4	3	2	4	5	5	5
2	2	13	63	3	3	2	2	4	2	4	5	4	3	1	4	4	2	2	5	4	4	2	4	2	4	4	2	3
2	2	18	60	5	3	2	5	4	5	2	4	4	5	3	4	5	4	3	5	5	5	5	3	3	4	5	5	5
2	2	18	92	4	3	4	1	1	2	4	5	1	4	3	3	5	3	3	3	5	5	5	2	5	3	5	2	5
2	2	15	87	1	1	2	1	1	1	1	5	1	5	1	5	3	1	5	5	5	5	5	1	3	5	5	5	5
2	2	13	72	2	3	4	4	2	3	2	5	3	3	4	4	4	2	3	4	4	5	4	3	4	5	4	3	4
2	2	13	86	3	2	3	4	3	3	3	5	1	1	1	3	5	3	4	5	3	4	5	1	4	4	5	4	4
2	1	18	72	5	3	3	3	4	4	5	5	3	1	3	1	3	5	5	5	3	3	2	3	5	1	5	5	5
2	1	17	67	5	4	3	4	2	2	5	5	5	2	2	4	5	5	4	5	5	4	4	2	4	4	5	4	5
2	1	15	67	2	3	3	4	2	5	1	3	3	5	1	2	4	3	3	2	4	3	1	3	1	2	3	3	1
2	2	16	60	3	3	4	3	2	2	3	3	3	4	4	3	4	4	4	4	4	4	4	2	4	2	4	2	4
2	2	15	55	2	2	2	4	3	2	4	4	3	4	3	3	4	4	2	2	2	2	2	3	3	2	4	3	4
2	1	16	62	3	2	4	2	3	3	4	4	2	3	4	3	4	3	4	4	4	3	2	2	5	3	4	3	2
2	2	15	60	5	2	3	3	3	3	1	2	2	4	5	2	4	1	4	4	5	1	5	4	5	4	4	4	1
2	2	13	55	4	3	4	4	3	4	2	5	4	3	3	3	5	5	4	4	3	4	3	4	4	3	5	5	4
2	1	17	58	2	1	5	2	3	5	3	4	1	5	5	3	2	1	3	5	5	5	3	4	5	5	5	3	1
2	1	17	76	3	3	4	3	3	3	3	5	4	4	3	2	5	3	4	5	3	3	3	3	4	4	5	4	5
2	2	16	63	4	2	4	3	3	4	2	5	3	3	4	2	4	4	5	4	3	3	3	2	4	4	4	2	4
2	2	17	71	3	3	2	3	4	4	2	4	2	5	1	4	4	4	5	3	4	3	3	2	2	2	4	3	5
2	1	15	81	3	2	3	3	1	2	4	5	2	1	3	5	4	4	5	5	5	4	5	1	4	3	5	2	5
2	1	12	78	2	2	4	2	2	2	3	5	2	3	4	3	4	3	4	5	4	4	4	3	4	4	5	3	4
2	1	17	98	1	1	5	1	1	1	1	5	1	1	5	5	5	3	5	5	5	5	5	1	5	1	5	1	1
2	1	17	66	3	2	3	5	2	3	1	5	2	4	4	4	5	1	3	5	1	1	1	3	1	5	3	5	5
2	1	17	68	1	1	4	1	1	3	1	4	1	3	2	4	1	1	4	4	1	4	5	4	4	2	5	1	1
2	2	14	91	5	3	1	1	3	1	3	5	3	3	3	5	5	5	5	5	3	5	3	1	5	4	5	3	5
2	2	14	76	3	1	3	2	3	3	2	5	3	4	5	5	4	2	4	4	5	3	3	3	3	3	5	2	5
2	2	14	88	2	1	5	3	1	1	1	5	1	1	5	1	1	1	5	5	5	5	5	1	5	5	5	1	5
2	1	14	77	2	1	3	4	2	4	2	4	2	4	2	4	4	2	4	4	4	4	4	4	2	2	4	4	4
2	2	13	60	4	2	3	5	3	3	3	3	3	2	3	3	5	3	5	5	5	4	1	1	2	4	3	3	4
2	2	18	65	5	5	2	2	4	2	5	4	4	2	3	2	2	5	4	5	4	4	4	3	2	3	4	3	3
2	2	12	58	4	3	3	2	3	2	4	3	3	3	3	3	3	2	3	4	3	3	3	3	3	3	4	2	3
2	2	13	66	2	5	5	5	1	1	1	3	3	2	5	2	5	5	1	3	1	5	3	3	3	5	5	3	3
2	1	13	56	2	1	4	2	2	2	4	2	3	3	3	2	4	2	4	4	4	5	4	2	4	4	3	3	4
2	2	17	68	5	5	3	3	4	4	4	2	4	4	3	2	2	4	5	2	5	4	4	3	4	5	2	2	4
2	1	16	70	3	5	4	4	4	4	4	4	4	3	4	2	5	5	4	5	4	4	4	3	3	2	4	3	5
2	2	17	75	2	3	4	1	1	3	4	1	1	2	3	1	4	4	3	4	4	4	4	3	4	4	1	3	3
2	2	16	81	5	1	2	2	1	2	4	3	2	5	2	2	5	5	5	5	1	5	5	5	5	2	5	2	5
2	1	12	67	3	2	3	2	2	4	3	4	2	4	3	4	5	3	4	4	4	4	4	3	5	3	5	4	5
2	1	15	67	1	1	4	4	5	3	5	5	2	4	4	5	5	2	5	5	4	5	5	4	2	5	5	4	4
2	1	18	83	4	5	2	5	2	4	5	5	5	3	3	5	5	5	3	3	5	5	5	1	2	5	5	2	4
2	1	15	80	2	1	5	1	5	1	1	5	1	1	5	5	5	4	4	5	4	2	1	1	5	2	5	1	5
2	2	16	80	4	2	3	2	1	4	3	5	2	3	4	4	4	4	4	4	4	4	4	3	3	3	2	3	2
2	2	15	61	2	2	2	4	5	5	1	5	4	5	2	1	5	3	4	5	4	4	1	2	1	5	2	5	4
2	1	16	58	5	1	5	4	2	1	1	3	3	2	4	4	5	3	5	3	5	4	1	2	1	5	4	5	3
2	1	13	63	5	5	5	4	5	1	5	5	5	2	4	5	5	5	4	5	5	2	5	1	4	5	5	2	5
2	2	18	86	1	1	5	1	5	1	2	1	1	5	3	5	5	1	4	5	5	5	5	2	1	2	5	1	1
2	1	15	71	3	3	5	1	3	1	2	5	3	2	5	5	5	2	3	5	5	5	5	2	5	5	5	1	5
2	2	16	67	3	2	4	2	2	3	3	4	2	2	4	2	4	4	3	4	4	3	2	2	5	4	3	4	4
2	2	12	67	3	2	3	2	4	2	4	4	3	4	3	3	4	3	4	3	4	3	2	3	3	4	4	3	3
2	2	14	78	2	1	2	3	2	3	4	5	2	2	2	4	5	1	4	5	4	4	5	2	3	4	5	3	3
2	1	13	73	5	4	4	3	3	3	4	4	3	4	3	2	3	4	3	3	4	3	4	3	3	4	4	4	4
2	1	17	73	5	5	5	3	3	2	3	4	5	2	4	3	5	5	5	5	5	5	4	1	5	5	5	1	5
2	1	16	85	5	3	4	2	1	3	1	5	1	3	4	3	5	4	5	5	5	5	5	3	3	3	5	2	5
2	1	15	72	3	2	5	5	2	1	1	4	4	4	5	5	5	5	3	4	5	4	3	3	4	5	5	5	5
2	1	15	71	4	2	4	1	3	2	5	4	4	5	2	3	5	2	5	4	4	2	5	3	5	5	5	5	4
2	2	18	67	2	1	4	2	2	2	3	5	2	3	3	5	5	3	5	5	4	4	4	2	2	4	5	3	4
2	2	16	73	4	5	3	3	1	3	2	2	4	3	2	5	3	5	4	2	3	3	3	4	2	3	4	4	4
2	1	12	72	5	5	2	2	4	4	4	3	5	4	1	2	4	5	4	4	4	4	1	4	3	4	4	4	4
2	1	18	75	2	1	3	1	1	2	1	4	2	2	3	4	5	4	5	3	2	4	4	1	4	2	3	2	4
2	1	17	70	2	1	3	4	1	3	1	5	1	4	4	2	3	1	5	5	3	4	5	3	4	3	5	3	2
2	2	15	70	5	4	3	1	5	1	4	5	4	3	3	1	3	5	4	5	5	5	5	1	4	4	5	4	5
2	2	17	68	5	3	4	1	3	1	5	3	1	2	4	5	5	5	4	4	5	4	5	1	4	2	4	1	5
2	1	18	57	2	2	3	3	3	2	3	3	3	3	2	3	4	3	4	2	4	3	4	1	3	2	3	3	3
2	1	15	67	4	5	5	4	5	5	5	5	5	2	5	5	5	5	5	5	5	5	5	1	1	5	5	1	5
2	1	15	77	3	1	4	4	2	2	4	5	2	4	2	4	5	2	4	5	4	4	4	2	4	5	5	4	4
2	2	13	86	1	1	3	2	2	4	1	4	1	4	2	4	4	1	5	4	4	4	5	2	1	3	4	3	2
2	2	14	70	1	2	3	4	3	1	2	2	2	1	3	3	4	2	5	4	4	4	4	1	3	5	3	2	1
2	2	14	72	3	2	5	1	2	2	4	5	2	1	5	2	5	3	5	5	5	5	5	1	5	5	5	2	5
2	2	13	80	4	2	3	2	1	4	3	5	2	3	4	4	4	4	4	4	4	4	4	3	3	3	2	3	2
2	2	12	61	2	2	2	4	5	5	1	5	4	5	2	1	5	3	4	5	4	4	1	2	1	5	2	5	4
2	2	15	58	5	1	5	4	2	1	1	3	3	2	4	4	5	3	5	3	5	4	1	2	1	5	4	5	3
2	1	18	63	5	5	5	4	5	1	5	5	5	2	4	5	5	5	4	5	5	2	5	1	4	5	5	2	5
2	2	14	86	1	1	5	1	5	1	2	1	1	5	3	5	5	1	4	5	5	5	5	2	1	2	5	1	1
2	1	12	71	3	3	5	1	3	1	2	5	3	2	5	5	5	2	3	5	5	5	5	2	5	5	5	1	5
2	2	12	67	3	2	4	2	2	3	3	4	2	2	4	2	4	4	3	4	4	3	2	2	5	4	3	4	4
2	2	14	67	3	2	3	2	4	2	4	4	3	4	3	3	4	3	4	3	4	3	2	3	3	4	4	3	3
2	2	15	78	2	1	2	3	2	3	4	5	2	2	2	4	5	1	4	5	4	4	5	2	3	4	5	3	3
2	2	17	73	5	4	4	3	3	3	4	4	3	4	3	2	3	4	3	3	4	3	4	3	3	4	4	4	4
2	2	13	77	2	1	3	4	2	4	2	4	2	4	2	4	4	2	4	4	4	4	4	4	2	2	4	4	4
2	1	14	60	4	2	3	5	3	3	3	3	3	2	3	3	5	3	5	5	5	4	1	1	2	4	3	3	4
2	1	14	65	5	5	2	2	4	2	5	4	4	2	3	2	2	5	4	5	4	4	4	3	2	3	4	3	3
2	2	13	58	4	3	3	2	3	2	4	3	3	3	3	3	3	2	3	4	3	3	3	3	3	3	4	2	3
2	2	14	66	2	5	5	5	1	1	1	3	3	2	5	2	5	5	1	3	1	5	3	3	3	5	5	3	3
2	2	13	56	2	1	4	2	2	2	4	2	3	3	3	2	4	2	4	4	4	5	4	2	4	4	3	3	4
2	1	13	68	5	5	3	3	4	4	4	2	4	4	3	2	2	4	5	2	5	4	4	3	4	5	2	2	4
2	2	14	70	3	5	4	4	4	4	4	4	4	3	4	2	5	5	4	5	4	4	4	3	3	2	4	3	5
2	1	14	67	3	2	5	3	3	3	3	5	3	3	5	5	5	3	5	5	5	5	4	3	4	5	5	4	5
2	1	14	77	3	5	5	5	3	5	3	5	5	5	3	3	5	3	5	5	5	5	4	5	1	5	5	4	5
2	2	14	83	4	2	4	1	1	1	2	4	2	2	2	5	4	3	4	5	5	5	3	2	4	3	4	3	3
2	1	14	82	4	3	5	1	3	1	3	4	3	3	5	4	5	5	5	5	4	4	2	1	4	3		3	3
2	2	13	82	1	1	5	1	1	1	1	5	1	3	4	5	5	1	5	5	5	5	4	1	3	3	5	1	5
2	2	14	61	3	3	5	1	2	1	1	3	3	3	4	3	3	4	4	3	5	4	4	3	4	3	3	2	3
2	1	13	55	3	3	5	2	3	4	2	3	3	3	4	3	4	2	3	3	4	3	2	2	4	3	3	2	3
2	2	13	63	5	5	4	4	3	3	5	3	5	3	2	4	5	5	4	4	4	4	4	3	3	4	4	4	4
2	1	14	73	3	3	3	3	3	3	4	4	2	2	3	3	3	3	5	4	4	3	4	2	4	4	4	3	4
2	2	14	86	4	5	5	5	5	2	3	1	3	2	5	5	5	5	5	1	5	4	1	3	5	5	5	5	1
2	2	14	81	2	2	2	1	2	1	1	5	1	2	2	5	4	4	4	5	5	4	4	2	3	3	5	2	3
2	2	14	56	3	3	3	4	4	4	4	2	3	3	2	3	4	3	2	3	2	4	3	3	3	4	3	3	3
2	2	14	55	3	3	3	4	3	2	2	4	3	4	3	2	2	2	3	2	2	3	2	3	2	2	2	4	4
2	2	13	73	4	3	1	4	4	5	3	5	3	5	1	2	2	4	2	5	4	4	3	4	2	2	5	3	4
2	2	14	62	4	2	4	3	2	3	4	5	3	3	4	5	5	1	5	5	5	5	5	3	4	4	5	3	4
2	1	14	65	5	1	5	2	2	4	2	4	3	2	5	4	3	4	5	4	4	5	4	1	4	4	5	1	5
2	2	13	65	4	3	3	2	3	2	3	4	4	4	2	2	4	3	4	5	5	4	5	2	5	4	5	4	4
2	1	13	82	5	2	4	4	4	2	5	4	3	4	3	4	5	3	5	4	5	5	3	2	3	5	4	2	5
2	2	14	65	1	1	2	2	2	2	3	4	2	4	3	4	4	2	4	4	5	4	4	2	3	3	4	3	5
2	2	14	72	4	1	5	1	5	4	1	5	1	2	5	5	1	2	5	5	5	5	5	1	5	5	5	2	1
2	1	13	67	4	5	5	3	2	4	4	5	2	2	4	5	5	2	4	5	4	5	2	3	5	5	5	4	4
2	2	13	77	1	1	4	2	1	1	2	5	4	4	3	3	5	1	5	5	4	4	4	1	3	4	5	3	4
2	2	13	66	2	3	5	1	3	1	3	5	2	2	5	4	5	3	5	5	4	5	5	1	4	5	5	4	4
2	2	13	75	5	2	3	1	1	1	4	5	5	3	3	1	4	5	5	5	2	5	1	3	3	5	5	1	5
2	1	13	63	2	1	1	1	1	2	3	3	1	3	2	3	4	3	3	3	3	3	4	2	3	2	3	2	4
2	2	13	61	5	4	4	5	4	4	4	5	5	4	2	5	5	4	4	5	2	3	2	3	3	3	4	3	5
2	2	14	76	4	3	2	4	2	4	4	5	3	3	3	4	4	5	5	5	3	3	4	3	2	4	5	5	5
2	2	14	63	3	3	2	2	4	2	4	5	4	3	1	4	4	2	2	5	4	4	2	4	2	4	4	2	3
2	2	14	60	5	3	2	5	4	5	2	4	4	5	3	4	5	4	3	5	5	5	5	3	3	4	5	5	5
2	1	14	92	4	3	4	1	1	2	4	5	1	4	3	3	5	3	3	3	5	5	5	2	5	3	5	2	5
2	2	13	87	1	1	2	1	1	1	1	5	1	5	1	5	3	1	5	5	5	5	5	1	3	5	5	5	5
2	2	13	72	2	3	4	4	2	3	2	5	3	3	4	4	4	2	3	4	4	5	4	3	4	5	4	3	4
2	1	13	71	3	3	2	3	4	4	2	4	2	5	1	4	4	4	5	3	4	3	3	2	2	2	4	3	5
2	1	13	81	3	2	3	3	1	2	4	5	2	1	3	5	4	4	5	5	5	4	5	1	4	3	5	2	5
2	2	14	78	2	2	4	2	2	2	3	5	2	3	4	3	4	3	4	5	4	4	4	3	4	4	5	3	4
2	1	13	98	1	1	5	1	1	1	1	5	1	1	5	5	5	3	5	5	5	5	5	1	5	1	5	1	1
2	2	13	66	3	2	3	5	2	3	1	5	2	4	4	4	5	1	3	5	1	1	1	3	1	5	3	5	5
2	2	14	72	4	1	5	1	5	4	1	5	1	2	5	5	1	2	5	5	5	5	5	1	5	5	5	2	1
2	2	14	67	4	5	5	3	2	4	4	5	2	2	4	5	5	2	4	5	4	5	2	3	5	5	5	4	4
2	2	13	77	1	1	4	2	1	1	2	5	4	4	3	3	5	1	5	5	4	4	4	1	3	4	5	3	4
2	2	13	66	2	3	5	1	3	1	3	5	2	2	5	4	5	3	5	5	4	5	5	1	4	5	5	4	4
2	2	14	77	2	3	5	1	3	1	1	5	3	3	4	3	3	3	3	5	3	4	5	1	3	1	5	1	3
2	1	14	68	3	3	4	2	2	3	2	4	3	3	4	3	4	5	4	4	5	5	2	2	5	4	2	2	3
2	2	13	67	2	4	3	1	2	3	1	4	2	3	1	5	5	1	5	5	5	4	5	1	4	2	5	5	5
2	1	13	73	2	2	3	3	2	4	3	2	2	3	2	3	5	2	4	2	3	3	2	3	4	4	4	4	3
2	2	14	70	2	1	3	4	1	3	1	5	1	4	4	2	3	1	5	5	3	4	5	3	4	3	5	3	2
2	2	14	70	5	4	3	1	5	1	4	5	4	3	3	1	3	5	4	5	5	5	5	1	4	4	5	4	5
2	1	13	68	5	3	4	1	3	1	5	3	1	2	4	5	5	5	4	4	5	4	5	1	4	2	4	1	5
2	2	13	57	2	2	3	3	3	2	3	3	3	3	2	3	4	3	4	2	4	3	4	1	3	2	3	3	3
2	2	13	67	4	5	5	4	5	5	5	5	5	2	5	5	5	5	5	5	5	5	5	1	1	5	5	1	5
2	2	14	77	3	1	4	4	2	2	4	5	2	4	2	4	5	2	4	5	4	4	4	2	4	5	5	4	4
2	2	14	86	1	1	3	2	2	4	1	4	1	4	2	4	4	1	5	4	4	4	5	2	1	3	4	3	2

## Sheet: sandplay and ZTPI-C
Participants	Sex	Age	SDS	The number of grids in each dimension of nine-grid sandplay productions											Raw scores for each question on the Chinese version of Zimbardo Time Perspective Inventory(ZTPI-C)
				past negative grids	past positive grids	present negative grids	present positive grids	future negative grids	future positive grids	past grids	present grids	future grids	negative grids	positive grids	Q1	Q2	Q3	Q4	Q5	Q6	Q7	Q8	Q9	Q10	Q11	Q12	Q13	Q14	Q15	Q16	Q17	Q18	Q19	Q20	Q21	Q22	Q23	Q24	Q25
1	2	13	41	1	2	2	1	2	1	3	3	3	5	4	4	4	2	4	4	4	3	4	4	4	2	1	5	4	3	5	4	4	3	3	1	3	4	4	4
1	2	13	34	1	2	2	1	2	1	3	3	3	5	4	4	4	5	3	2	4	5	5	5	4	5	1	5	5	4	5	2	3	1	1	3	3	5	4	4
1	2	15	33	1	1	1	2	2	2	2	3	4	4	5	4	5	1	4	2	5	4	1	4	4	3	4	4	5	2	4	1	4	1	2	3	4	4	4	3
1	2	14	51	0	3	0	3	0	3	3	3	3	0	9	3	4	5	4	1	4	3	4	4	4	4	3	5	5	3	5	5	4	4	4	2	4	3	4	5
1	2	14	45	0	3	0	3	0	3	3	3	3	0	9	5	3	5	4	1	1	2	4	5	1	5	5	5	5	5	5	5	1	1	1	1	5	1	5	1
1	2	15	29	0	3	1	2	0	3	3	3	3	1	8	4	1	3	3	5	3	4	3	5	4	2	3	2	4	3	1	4	3	3	3	3	3	3	4	2
1	2	16	29	1	2	0	3	0	3	3	3	3	1	8	4	4	4	4	4	4	3	4	4	4	4	4	4	4	4	4	4	4	4	4	4	4	4	4	4
1	1	14	44	0	3	0	2	0	4	3	2	4	0	9	4	3	3	2	3	2	2	3	3	3	2	3	3	4	2	1	2	2	1	2	2	3	1	3	3
1	1	15	39	1	2	1	2	1	2	3	3	3	3	6	5	5	3	5	5	4	4	5	5	5	4	5	5	5	5	4	5	5	5	5	4	5	4	5	5
1	1	15	42	0	1	1	1	3	3	1	2	6	4	5	5	3	3	4	3	3	2	1	5	4	1	3	5	5	2	3	5	3	3	2	3	5	3	5	3
1	2	13	28	0	4	0	3	0	2	4	3	2	0	9	5	5	4	4	5	5	4	2	5	4	3	3	5	5	1	2	3	2	2	4	4	4	2	4	3
1	2	15	27	0	2	1	1	1	4	2	2	5	2	7	5	4	4	4	4	4	3	4	4	3	3	2	5	5	2	2	2	1	2	4	3	3	4	3	4
1	1	13	29	0	3	0	1	1	4	3	1	5	1	8	5	5	2	4	5	5	5	4	5	4	1	1	5	5	3	5	3	4	3	4	5	5	4	5	5
1	1	16	41	0	2	0	3	0	4	2	3	4	0	9	4	3	2	4	4	4	3	4	4	5	1	5	5	4	4	4	2	3	1	3	3	3	4	4	3
1	2	13	30	0	2	0	2	0	5	2	2	5	0	9	5	5	1	5	5	5	3	5	5	5	1	3	5	5	3	5	5	3	1	4	3	5	4	3	3
1	1	14	31	0	1	0	2	1	5	1	2	6	1	8	5	4	2	5	5	3	4	3	4	4	1	5	5	5	2	5	4	3	1	4	5	3	3	5	2
1	2	14	32	0	2	0	1	0	6	2	1	6	0	9	5	5	1	4	5	5	1	1	5	5	1	1	5	5	1	1	5	1	1	1	1	1	1	5	1
1	1	14	34	1	5	0	1	0	2	6	1	2	1	8	5	5	1	5	5	5	5	1	5	5	1	1	5	5	1	1	1	1	1	5	5	1	1	5	5
1	2	14	38	0	3	0	3	0	3	3	3	3	0	9	1	5	2	4	4	3	4	3	5	2	3	5	5	4	2	4	5	3	5	5	1	5	5	4	5
1	2	15	39	0	3	0	3	0	3	3	3	3	0	9	5	5	3	3	3	2	5	4	5	3	2	4	5	5	4	4	5	5	1	2	1	2	3	4	5
1	1	15	29	0	2	0	1	0	6	2	1	6	0	9	5	5	3	4	5	3	2	1	5	4	2	5	5	2	4	4	5	4	2	4	5	5	2	4	5
1	2	14	28	0	2	0	1	0	6	2	1	6	0	9	5	5	5	2	4	4	2	1	4	2	4	1	5	5	2	1	4	3	2	3	4	5	2	4	4
1	2	15	27	0	4	0	1	0	4	4	1	4	0	9	5	3	4	4	4	3	3	2	4	3	4	3	5	5	2	1	2	2	2	4	2	3	2	4	4
1	1	16	31	1	1	1	0	0	6	2	1	6	2	7	5	5	1	5	5	5	5	5	1	5	1	2	5	1	3	5	5	5	2	5	2	5	3	5	5
1	1	15	48	0	2	1	0	0	6	2	1	6	1	8	3	2	2	2	4	5	4	2	4	3	2	1	4	1	2	2	3	2	1	4	1	4	2	5	4
1	1	15	28	1	2	0	3	0	3	3	3	3	1	8	5	3	2	4	5	4	3	1	5	3	3	2	5	5	2	4	3	1	1	4	1	4	1	5	4
1	2	16	49	0	3	0	2	0	4	3	2	4	0	9	4	4	5	3	4	3	2	2	4	3	3	4	5	4	3	3	5	3	5	1	1	4	1	4	5
1	1	14	33	1	2	1	2	1	2	3	3	3	3	6	5	4	3	5	5	4	5	4	5	5	3	5	5	5	2	4	2	1	2	3	3	5	5	5	5
1	2	13	28	1	1	3	1	1	2	2	4	3	5	4	4	5	1	4	4	3	3	2	4	4	2	3	4	5	2	2	4	3	3	3	4	4	3	4	3
1	1	14	49	1	2	2	1	1	2	3	3	3	4	5	4	1	1	3	2	4	4	5	2	4	1	2	3	4	3	4	3	4	5	3	3	4	4	4	3
2	2	14	75	5	2	1	1	0	0	7	2	0	6	3	4	1	4	2	3	4	4	5	1	1	3	5	5	1	5	5	5	5	5	3	3	3	5	3	5
2	1	13	70	5	3	0	1	0	0	8	1	0	5	4	5	4	5	3	3	2	3	5	2	4	2	5	2	4	4	2	3	3	2	3	3	4	4	5	4
2	1	14	70	3	1	1	0	3	1	4	1	4	7	2	3	3	5	2	2	2	3	4	2	4	4	2	4	4	4	4	4	4	4	3	4	4	3	3	4
2	1	16	56	3	0	1	0	3	2	3	1	5	7	2	3	3	3	4	4	4	4	2	3	3	2	3	4	3	2	3	2	4	3	3	3	4	3	3	3
2	1	15	55	8	1	0	0	0	0	9	0	0	8	1	3	3	3	4	3	2	2	4	3	4	3	2	2	2	3	2	2	3	2	3	2	2	2	4	4
2	2	16	73	2	1	1	0	5	0	3	1	5	8	1	4	3	1	4	4	5	3	5	3	5	1	2	2	4	2	5	4	4	3	4	2	2	5	3	4
2	2	15	62	3	2	0	0	2	2	5	0	4	5	4	4	2	4	3	2	3	4	5	3	3	4	5	5	1	5	5	5	5	5	3	4	4	5	3	4
2	1	13	65	5	0	0	0	3	1	5	0	4	8	1	5	1	5	2	2	4	2	4	3	2	5	4	3	4	5	4	4	5	4	1	4	4	5	1	5
2	1	14	65	5	0	2	0	0	2	5	2	2	7	2	4	3	3	2	3	2	3	4	4	4	2	2	4	3	4	5	5	4	5	2	5	4	5	4	4
2	2	14	82	4	1	1	1	1	1	5	2	2	6	3	5	2	4	4	4	2	5	4	3	4	3	4	5	3	5	4	5	5	3	2	3	5	4	2	5
2	1	15	65	3	1	2	1	0	2	4	3	2	5	4	1	1	2	2	2	2	3	4	2	4	3	4	4	2	4	4	5	4	4	2	3	3	4	3	5
2	2	16	72	4	1	1	0	3	0	5	1	3	8	1	4	1	5	1	5	4	1	5	1	2	5	5	1	2	5	5	5	5	5	1	5	5	5	2	1
2	2	13	67	3	0	3	0	3	0	3	3	3	9	0	4	5	5	3	2	4	4	5	2	2	4	5	5	2	4	5	4	5	2	3	5	5	5	4	4
2	1	16	77	3	1	3	1	1	0	4	4	1	7	2	1	1	4	2	1	1	2	5	4	4	3	3	5	1	5	5	4	4	4	1	3	4	5	3	4
2	2	14	66	4	2	1	1	1	0	6	2	1	6	3	2	3	5	1	3	1	3	5	2	2	5	4	5	3	5	5	4	5	5	1	4	5	5	4	4
2	2	13	77	5	2	0	1	1	0	7	1	1	6	3	2	3	5	1	3	1	1	5	3	3	4	3	3	3	3	5	3	4	5	1	3	1	5	1	3
2	1	14	68	4	1	2	0	2	0	5	2	2	8	1	3	3	4	2	2	3	2	4	3	3	4	3	4	5	4	4	5	5	2	2	5	4	2	2	3
2	1	16	67	3	0	1	0	3	2	3	1	5	7	2	2	4	3	1	2	3	1	4	2	3	1	5	5	1	5	5	5	4	5	1	4	2	5	5	5
2	1	15	73	5	1	1	0	2	0	6	1	2	8	1	2	2	3	3	2	4	3	2	2	3	2	3	5	2	4	2	3	3	2	3	4	4	4	4	3
2	2	16	81	2	1	1	0	5	0	3	1	5	8	1	5	1	4	5	1	5	4	5	2	2	4	5	5	5	5	5	5	5	5	2	4	4	5	1	5
2	2	15	75	3	2	0	0	3	1	5	0	4	6	3	3	3	4	3	1	3	2	5	3	4	3	2	1	1	4	5	4	3	3	3	3	3	5	4	4
2	1	13	71	4	1	1	0	3	0	5	1	3	8	1	2	2	4	3	2	2	1	5	1	5	3	5	3	1	5	5	3	3	5	1	5	3	5	1	3
2	2	15	68	3	1	2	0	2	1	4	2	3	7	2	5	5	4	3	4	3	2	4	5	3	4	1	3	4	4	4	3	3	3	2	5	4	4	2	4
2	2	17	68	4	1	1	1	1	1	5	2	2	6	3	2	2	3	4	3	2	3	3	3	2	4	4	4	4	4	4	5	4	4	2	4	4	2	4	4
2	2	15	80	3	1	2	1	0	2	4	3	2	5	4	5	3	4	4	1	4	1	5	3	4	1	5	5	3	4	5	5	2	1	3	1	5	5	3	5
2	2	16	71	4	1	1	0	3	0	5	1	3	8	1	4	2	2	3	3	4	4	4	2	3	2	1	4	3	3	4	4	3	3	3	2	3	3	3	4
2	2	13	76	3	0	3	0	3	0	3	3	3	9	0	1	4	5	1	1	1	3	5	1	2	4	4	5	1	5	5	4	4	1	2	4	4	5	2	5
2	2	16	77	1	2	4	1	1	0	3	5	1	6	3	3	2	3	2	2	2	2	4	2	3	3	3	4	4	4	4	4	4	3	3	2	4	4	2	2
2	2	14	85	4	1	1	0	3	0	5	1	3	8	1	4	3	4	3	2	1	5	5	3	3	5	5	5	3	1	1	5	4	5	3	5	2	5	3	5
2	2	15	55	3	1	2	0	2	1	4	2	3	7	2	4	3	2	5	2	5	2	2	3	4	1	4	4	4	3	4	3	4	5	3	3	2	4	4	2

## Sheet: codebook
		Participants 1= Control group	Participants 2= Depression group
		Sex 1= male	Sex 2= female
		Age= 12-18 years old
		SDS=Self-rating Depression Scale score
		ZTPI-C = The Chinese version of Zimbardo Time Perspective Inventory included 25 questions with 5 dimensions (Past Negative, Past Positive,Present Impulsive, Present Fatalistic, and Future). The ZTPI-C is scored on a 5-point scale ranging from 1 (very non-conformant) to 5 (very conformant).	Past Negative(PN): Q8, Q12, Q13, Q15, Q16, Q23, Q25
			Past Positive(PP):Q1, Q2, Q5, Q7, Q9, Q14
			Present Impulsive(PI):Q3, Q11, Q21, Q22
			Present Fatalistic(PF):Q17, Q18, Q19
			Future(F):Q4, Q6, Q10, Q20, Q24.
		The deviation-balanced time perspective (DBTP) was used to calculate the balanced TP
		oPN, oPP, oPF, oPH, and oF represent the optimal values of PN, PP, PF, PH, and F scores, respectively, while ePN, ePP, ePF, ePH, and eF are the actual scores for each dimension. 1 for PN, 5 for PP, 5 for F, 1 for PI, and 1 for PF
